# Supplementary material for: Chemical and Biological Aspects of Different Species of the Genus Clinanthus Herb. (Amaryllidaceae) from South America
Source: MDPI journal article supplement (doi:10.3390/molecules28145408), 2023-07-14
Supplement: s1 [file s1]

Supplementary Material

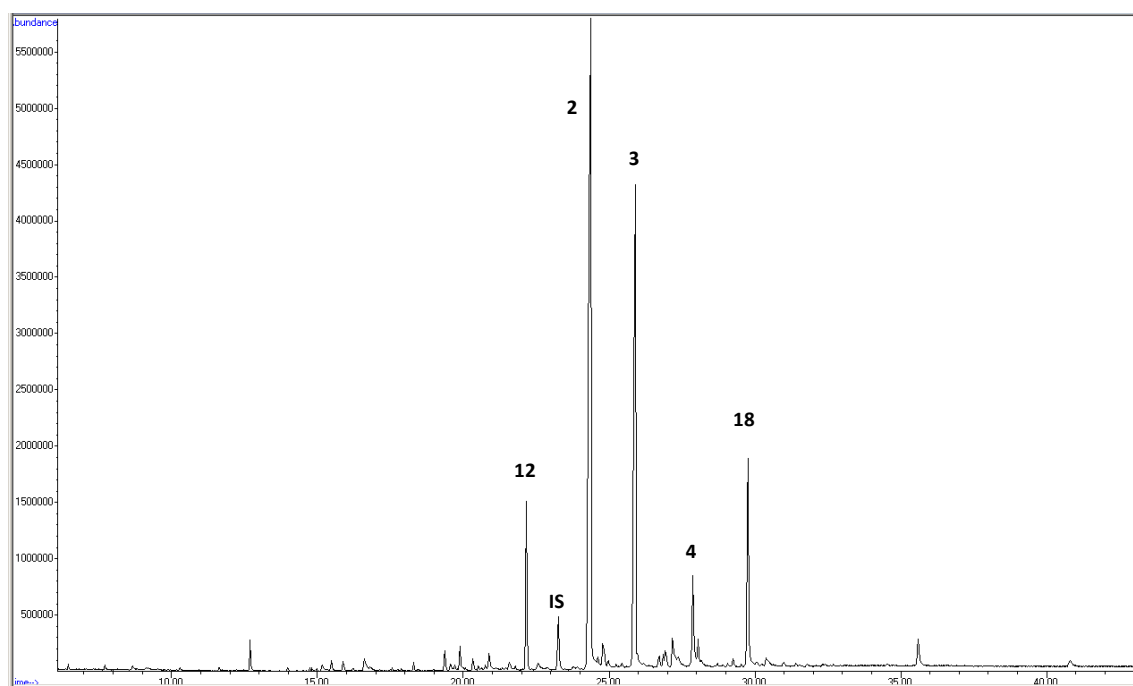

**Figure S1.** GC chromatogram of the alkaloid extract of *Clinanthus* sp. (sample A).

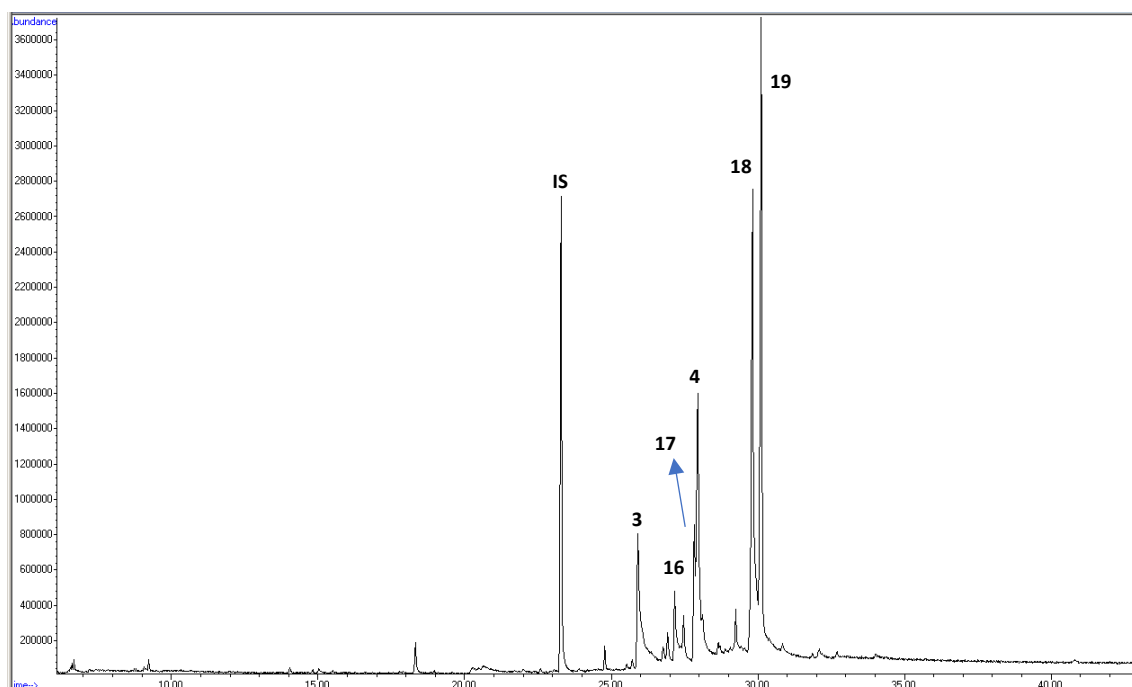

**Figure S2.** GC chromatogram of the alkaloid extract of *Clinanthus incarnatus* (sample B).

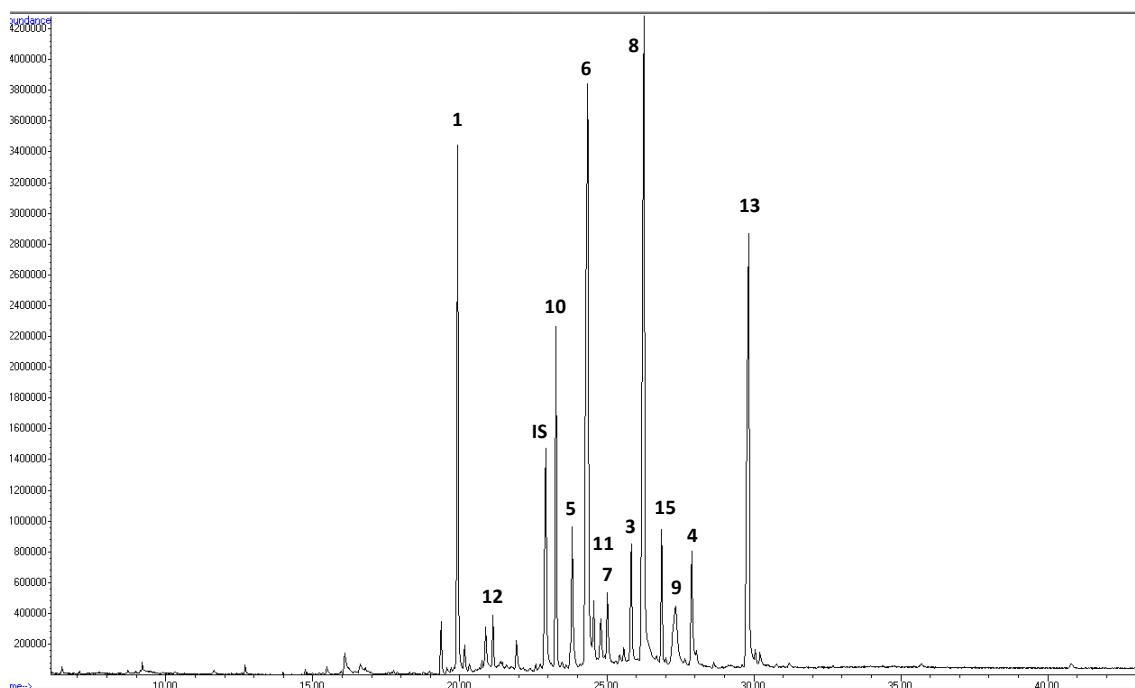

**Figure S3.** GC chromatogram of the alkaloid extract of *Clinanthus variegatus* from Bolivia (sample C).

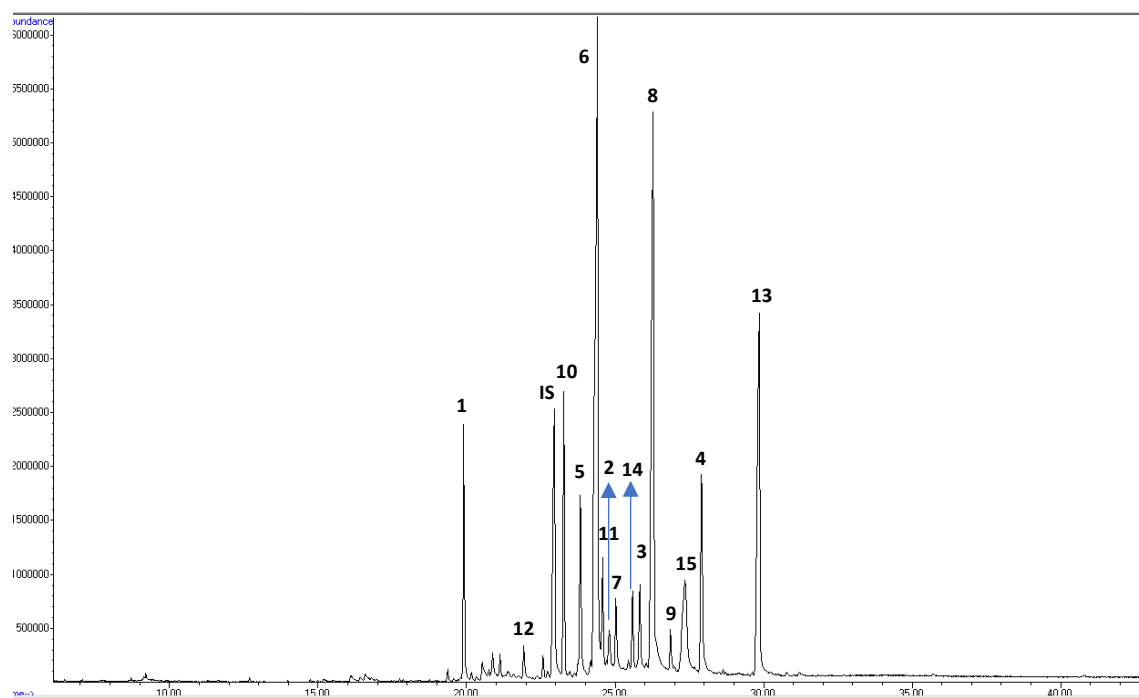

**Figure S4.** GC chromatogram of the alkaloid extract of *Clinanthus variegatus* from Peru (sample D).
